# Supplementary material for: Cross-species screening of microsatellite markers for individual identification of snow petrel Pagodroma nivea and Wilson's storm petrel Oceanites oceanicus in Antarctica
Source: PeerJ. 2018 Jul 20;6:e5243. doi: 10.7717/peerj.5243 (PMC6055593; doi:10.7717/peerj.5243)
Supplement: Supplemental Information 2 — Raw data for Snow Petrel microsatellites. [file peerj-06-5243-s002.xlsx]

## Sheet: Sheet1
Sample ID	Microsatellite loci
	ptero01	ptero01	ptero07	ptero07	paequ03	paequ03	ptero03	ptero03	paequ08	paequ08	paequ02	paequ02	ptero04	ptero04	ptero08	ptero08	paequ10	paequ10	paequ13	paequ13	paequ07	paequ07	ptero09	ptero09
SP_016	169	169	169	217	235	235	88	88	223	223	200	200	135	135	205	205	181	181	148	148	314	314	169	181
SP_017	169	169	185	217	223	235	104	104	223	223	200	200	127	135	205	205	181	189	148	148	314	318	177	177
SP_026	169	169	217	217	219	235	104	104	219	221	198	198	127	135	205	205	181	181	148	148	314	318	177	189
SP_053	169	169	185	185	229	237	82	104	223	223	200	200	135	135	205	221	183	183	148	148	314	314	169	173
SP_064	169	169	177	217	223	235	104	104	223	223	200	200	127	135	205	205	189	191	148	148	312	314	179	179
SP_067	169	169	185	185	229	233	104	104	223	223	200	200	135	135	205	205	181	181	148	148	314	314	173	177
SP_068	169	169	185	185	223	235	104	104	223	223	200	200	127	135	205	205	185	189	146	146	314	314	173	177
SP_079	169	169	185	185	223	235	104	104	223	223	200	200	127	135	169	217	181	181	148	148	314	314	173	181
SP_105	169	169	185	185	235	241	82	104	223	223	180	180	115	115	189	201	181	181	148	148	314	314	181	185
SP_110	169	169	177	185	235	241	82	104	223	223	200	200	135	135	209	217	181	181	148	148	314	314	181	185
SP_116	0	0	169	217	223	235	104	104	223	223	200	200	127	127	185	185	181	181	142	146	314	314	181	181
SP_126	169	169	177	217	223	235	104	104	223	223	184	200	135	139	201	205	181	181	148	148	314	314	181	181
SP_128	161	169	185	185	223	235	104	104	223	223	200	200	127	135	205	205	185	193	148	148	312	314	177	181
SP_132	169	169	169	185	0	0	104	104	223	223	200	200	127	135	205	205	187	187	148	148	314	318	181	181
SP_133	169	169	185	185	233	239	104	104	223	223	200	200	135	135	205	205	181	181	148	148	314	314	177	181
SP_140	169	169	217	217	227	227	104	104	223	223	200	200	135	135	201	201	181	181	148	148	314	314	161	169
SP_170	169	169	185	185	223	235	104	104	223	223	170	200	127	135	205	205	191	191	148	148	312	312	177	181
SP_175	169	169	201	217	235	235	104	104	223	223	200	200	135	145	189	209	181	181	148	148	314	318	169	181
SP_177	169	177	217	217	229	229	104	104	215	223	200	200	145	145	201	209	181	181	148	148	318	318	169	181
SP_181	169	169	217	217	235	243	104	104	223	223	200	200	135	145	201	205	181	181	148	148	314	314	177	181
SP_188	169	169	185	201	223	235	94	94	223	223	200	200	127	135	189	205	189	189	148	148	312	314	181	181
SP_193	161	169	177	217	235	235	104	104	223	223	172	172	127	135	189	213	189	189	142	142	314	314	173	177
SP_194	169	169	185	193	231	237	82	104	215	223	200	200	137	137	205	205	181	181	144	144	314	314	181	181
SP_196	161	169	169	217	223	235	104	104	223	223	200	200	135	135	189	221	181	191	148	148	314	314	177	181
SP_197	169	169	217	217	235	235	104	104	223	223	200	200	135	135	189	205	181	181	146	146	314	314	173	177
SP_229	165	165	185	185	219	219	104	104	223	223	200	200	127	135	205	205	181	181	146	146	314	314	177	181
SP_232	165	169	185	201	237	237	104	104	223	223	200	200	127	135	205	217	181	181	148	148	314	318	173	181
SP_241	169	169	185	185	227	235	104	104	223	223	200	200	135	137	181	181	181	181	148	148	314	318	177	177
SP_254	165	169	177	217	223	235	104	104	223	223	0	0	127	135	197	197	189	189	148	148	314	314	173	177
SP_258	169	169	185	185	223	235	104	104	223	223	172	172	127	135	205	209	189	189	148	148	312	314	177	181
SP_259	161	169	177	185	223	235	104	104	223	223	200	200	135	145	205	213	181	181	148	148	318	318	177	185
SP_261	169	169	185	217	235	235	104	104	223	223	200	200	135	135	205	217	181	183	146	146	314	314	173	173
SP_262	169	169	185	217	223	235	104	104	223	223	170	170	127	141	201	205	189	191	148	148	314	314	181	181
SP_265	165	169	0	0	223	235	94	94	223	223	200	200	127	135	205	205	189	191	142	148	314	314	173	181
SP_274	169	169	169	193	223	235	104	104	223	223	176	176	135	135	0	0	189	191	148	148	312	318	177	181
SP_284	169	169	185	185	231	231	82	104	215	223	200	200	135	145	181	205	181	181	144	148	314	314	161	185
SP_286	169	169	177	217	223	235	104	104	223	223	198	198	135	135	185	185	183	183	148	148	314	318	181	181
SP_294	169	169	209	217	235	235	104	104	215	223	200	200	135	135	205	217	181	181	144	148	314	314	181	181
SP_301	165	169	185	201	231	235	104	104	223	223	200	200	127	135	181	209	181	181	148	148	314	314	169	177
SP_304	169	169	185	217	235	235	104	104	223	223	200	200	135	141	189	189	181	181	148	148	314	318	173	181
SP_333	169	169	185	185	229	241	104	104	223	223	200	200	127	135	201	205	181	181	148	148	314	314	173	177
SP_341	165	169	185	185	219	235	104	104	221	223	200	200	135	145	201	205	181	181	148	148	314	314	165	177
SP_342	165	169	185	185	219	219	94	94	223	223	200	200	135	135	205	209	181	181	142	142	314	318	177	181
SP_352	169	169	185	185	221	221	104	104	223	223	200	200	143	147	205	209	181	181	146	146	314	318	173	177
SP_356	169	169	185	185	223	235	104	104	223	223	200	200	123	135	205	205	181	191	148	148	314	314	181	181
SP_357	169	187	185	193	223	231	104	104	215	223	200	200	135	143	205	205	181	181	148	148	314	314	181	185
SP_361	165	169	185	217	223	235	104	104	223	223	200	200	127	135	209	217	189	191	146	146	314	314	181	181
SP_364	161	169	185	185	223	235	104	104	223	223	200	200	127	133	189	189	0	0	148	148	314	314	173	181
SP_368	161	169	185	185	223	235	82	104	223	223	200	200	127	135	189	189	191	191	148	148	314	314	177	181
SP_369	169	169	177	217	235	235	104	104	219	221	198	198	135	135	0	0	181	181	148	148	314	318	177	181
SP_372	161	169	185	217	223	235	104	104	223	223	200	200	127	135	217	217	189	189	146	146	314	314	181	181
SP_374	169	169	193	205	235	235	104	104	223	223	200	200	135	139	205	205	181	181	148	148	318	318	177	177
SP_383	169	169	185	185	235	235	104	104	223	223	200	200	127	139	189	205	181	181	146	146	318	318	177	177
SP_386	169	187	185	193	223	231	104	104	215	223	200	200	135	143	205	205	181	181	146	146	314	314	181	185
SP_390	161	169	185	193	223	235	104	104	223	223	200	200	127	135	217	217	191	191	146	146	312	314	181	181
