# Supplementary material for: Cross-species screening of microsatellite markers for individual identification of snow petrel Pagodroma nivea and Wilson's storm petrel Oceanites oceanicus in Antarctica
Source: PeerJ. 2018 Jul 20;6:e5243. doi: 10.7717/peerj.5243 (PMC6055593; doi:10.7717/peerj.5243)
Supplement: Supplemental Information 3 — Sampling locations of snow petrel and Wilson's storm petrel in Antarctica. [file peerj-06-5243-s003.xlsx]

## Sheet: Sheet1
sample_id	lat	long
WSP_8	-69.4039	76.1886
WSP_94	-69.3796	76.2963
WSP_138	-69.4053	76.1886
WSP_142	-69.4048	76.1878
WSP_172	-69.4888	75.7664
WSP_180	-69.3979	76.3295
WSP_198	-69.4056	76.1807
WSP_199	-69.4056	76.1807
WSP_200	-69.4056	76.1807
WSP_201	-69.4056	76.1807
WSP_202	-69.4056	76.1807
WSP_203	-69.4056	76.1807
WSP_204	-69.4056	76.1807
WSP_205	-69.4056	76.1807
WSP_206	-69.4056	76.1807
WSP_207	-69.4056	76.1807
WSP_240	-69.4056	76.1809
WSP_325	-69.392	76.2281
WSP_326	-69.3771	76.292
WSP_327	-69.4039	76.1886
WSP_345	-69.3887	76.2476
WSP_348	-69.4039	76.1885
WSP_360	-69.4039	76.187
WSP_391	-69.3741	76.234
SP_16	-69.4043	76.1877
SP_17	-69.4043	76.1874
SP_26	-69.4043	76.1875
SP_53	-69.3795	76.2959
SP_64	-69.3794	76.296
SP_67	-69.3794	76.296
SP_68	-69.3794	76.296
SP_79	-69.373	76.14
SP_105	-69.38	76.2976
SP_110	-69.38	76.2976
SP_116	-69.4061	76.1825
SP_126	-69.3891	76.3907
SP_128	-69.3891	76.3907
SP_132	-69.3905	76.3984
SP_133	-69.3905	76.3984
SP_140	-69.4052	76.1885
SP_170	-69.3798	76.2177
SP_175	-69.5122	75.9247
SP_177	-70.7633	11.7251
SP_181	-69.3806	76.1878
SP_188	-69.4043	76.1875
SP_193	-69.4061	76.1825
SP_194	-69.3754	76.2367
SP_196	-69.3757	76.2364
SP_197	-69.4043	76.1875
SP_229	-69.374	76.2344
SP_232	-69.3905	76.3984
SP_241	-69.351	76.2094
SP_254	-69.4047	76.1874
SP_258	-69.3798	76.2177
SP_259	-69.3793	76.296
SP_261	-69.3502	76.2077
SP_262	-69.374	76.2344
SP_265	-69.3989	76.3314
SP_274	-69.3986	76.3307
SP_284	-69.3741	76.2343
SP_286	-69.4039	76.1887
SP_294	-70.7588	11.7266
SP_301	-70.7588	11.7266
SP_304	-70.7588	11.7266
SP_333	-69.399	76.3313
SP_341	-69.3769	76.2913
SP_342	-69.406	76.1825
SP_352	-69.3964	76.331
SP_356	-69.4039	76.1873
SP_357	-69.3957	76.3295
SP_361	-69.3746	76.2367
SP_364	-69.4043	76.1875
SP_368	-69.3754	76.2367
SP_369	-69.3758	76.2363
SP_372	-69.3904	76.2414
SP_374	-69.4043	76.1888
SP_383	-69.3754	76.2367
SP_386	-69.3957	76.3295
SP_390	-69.3741	76.2342
